# Supplementary material for: On chirality induction in the crystalline solid-containing sandwich-type [Ln(α-PW11O39)2]11−polyoxotungstate and proline
Source: Royal Society of Chemistry journal article supplement (doi:10.1039/c6ra22278a), 2016-01-01

## ***Supporting Information***

*On chirality induction in the crystalline solid-containing sandwich-type  $[Ln(\alpha\text{-PW}_{11}\text{O}_{39})_2]^{11-}$  polyoxotungstate and proline*

Jun Iijima<sup>1\*</sup>, Haruo Naruke<sup>2</sup>, and Takanobu Sanji<sup>3</sup>

<sup>1</sup>Division of Chemistry, School of Medicine, Nihon University, 30-1, Oyaguchikamicho, Itabashi-ku, Tokyo 173-8610, Japan

<sup>2</sup>Chemical Resources Laboratory, Tokyo Institute of Technology, R1-23, 4259, Nagatsuta-cho, Midori-ku, Yokohama, 226-8503, Japan.

<sup>3</sup>ERATO Iyoda Supra-integrated Material Project, Tokyo Institute of Technology, S2, 4259, Nagatsuta-cho, Midori-ku, Yokohama, 226-8503, Japan.

\*Corresponding author. Tel/fax: +81 3 3972 8111.

E-mail address: iijima.jun@nihon-u.ac.jp

## Figure Captions

### Figure S1

The IR spectra of **1-12** except for **2-L**, **2-D**, and **9-L**; (a) **1**, (b) **3**, (c) **4**, (d) **5**, (e) **6**, (f) **7**, (g) **8**, (h) **9-D**, (i) **10**, (j) **11**, (k) **12**.

### Figure S2

The CD spectra of the aqueous solutions of **3**, **4**, **7**, and **8**; (a) **3**, (b) **4**, (c) **7**, (d) **8**. The concentration of  $[\text{Ln}(\alpha\text{-PW}_{11}\text{O}_{39})_2]^{11-}$  (Ln = Nd for **3**, Sm for **4**, Tb for **7**, and Dy for **8**) in the solution is *c.a.* 20 mM. The f-f transitions of  $\text{Ln}^{3+}$  in  $[\text{Ln}(\alpha\text{-PW}_{11}\text{O}_{39})_2]^{11-}$  are assigned according to the following three references.

- i) P. Nachimuthu, R. Jagannathan, V. N. Kumar, D. N. Rao, *J. Non-Cryst. Solids*, **1997**, 217, 215.
- ii) S. But, S. Lis, R. V. Deun, T. N. Parac-Vogtm C. Görller-Walrand, K. Binnemans, *Spectrochim. Acta A*, **2005**, 62, 478.
- iii) T. Yamase, H. Naruke, *J. Phys. Chem. B*, **1999**, 103, 8850.

Figure S1

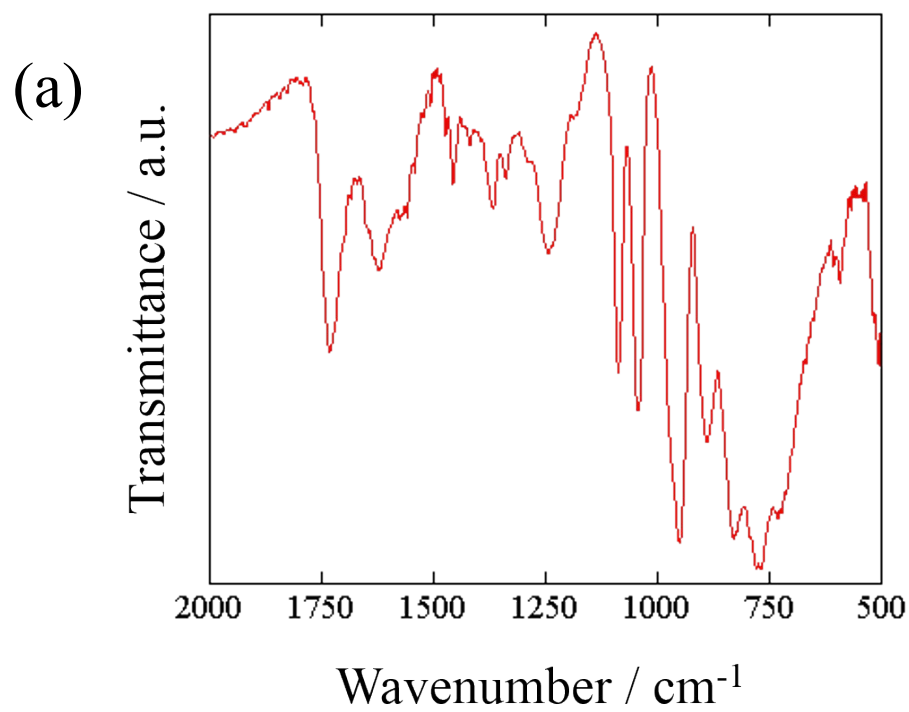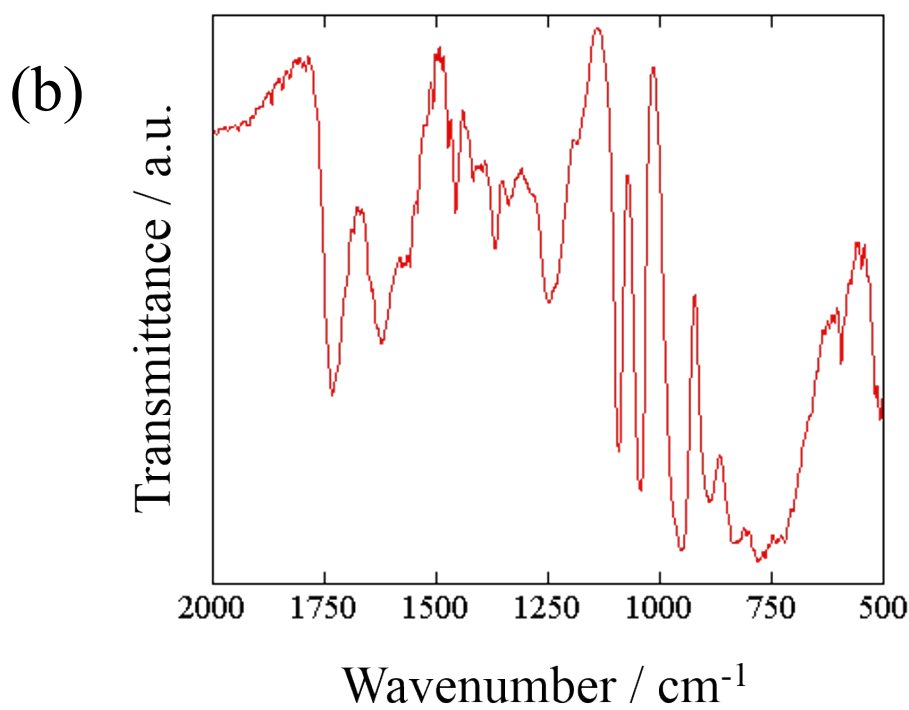

Figure S1 (Continued)

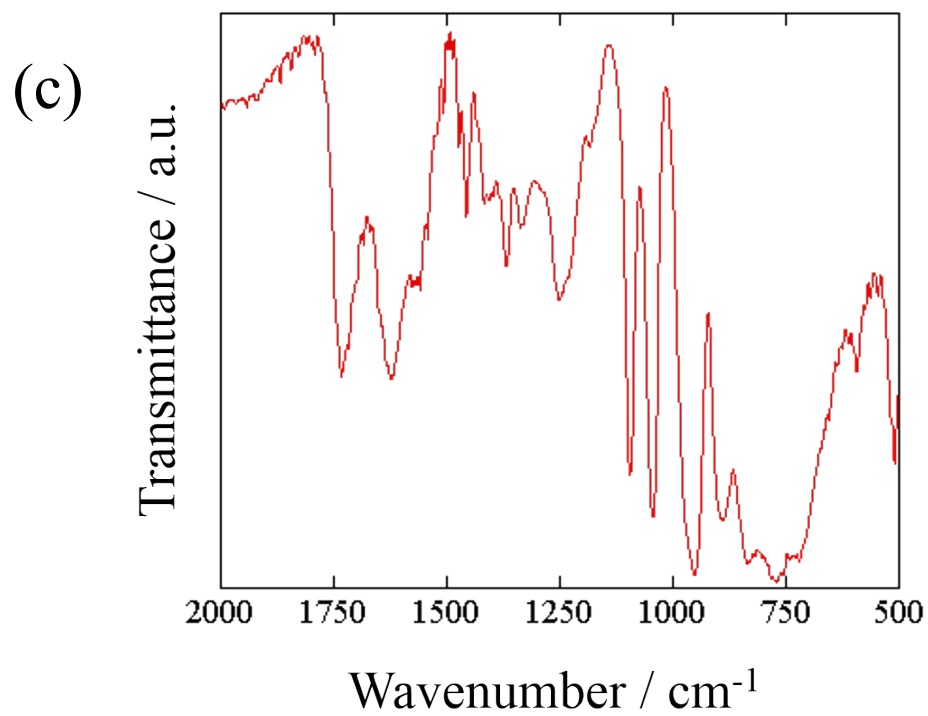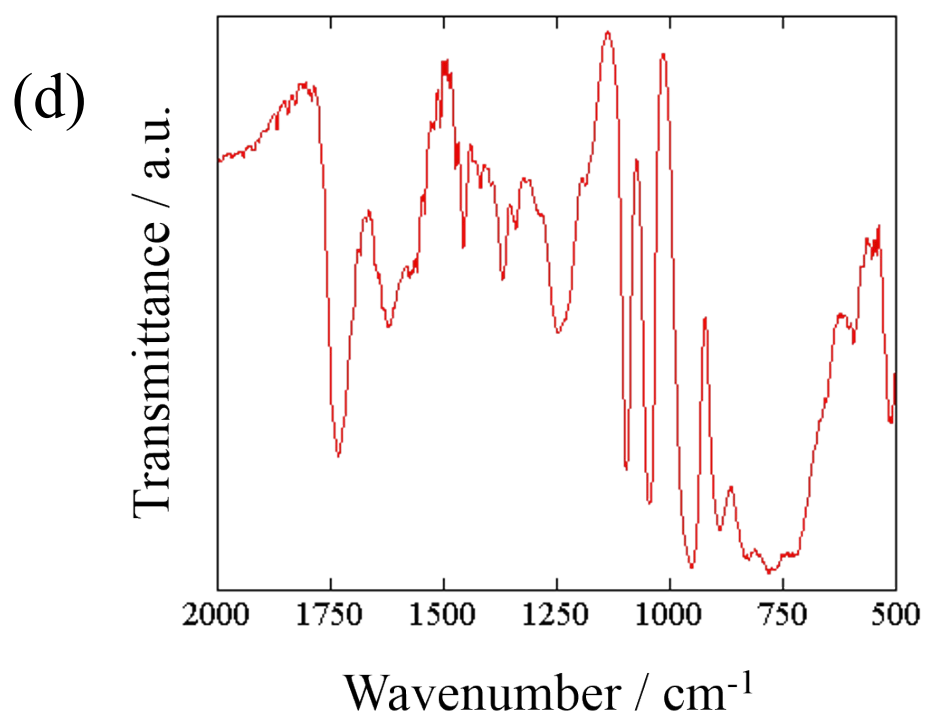

Figure S1 (Continued)

(e)

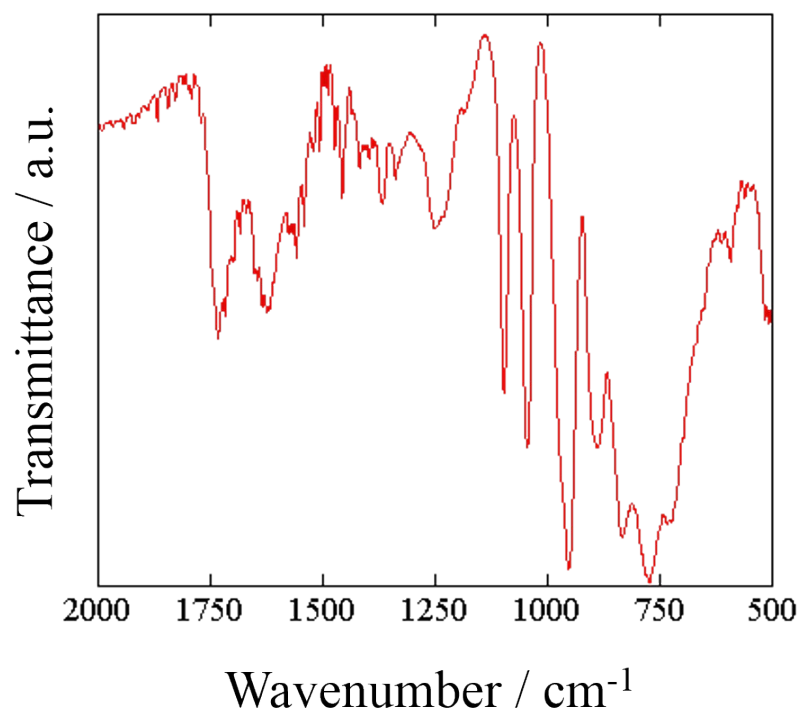

(f)

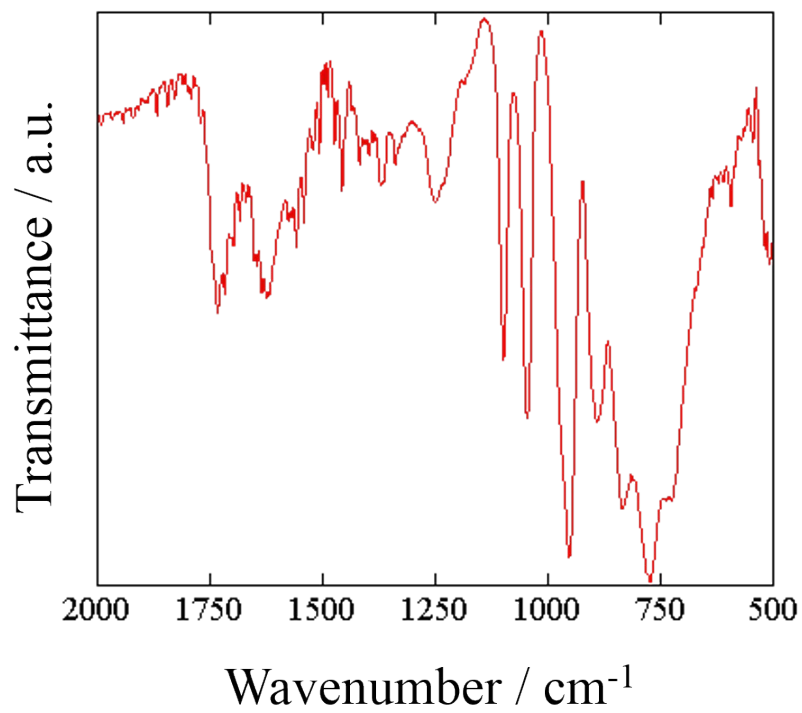

Figure S1 (Continued)

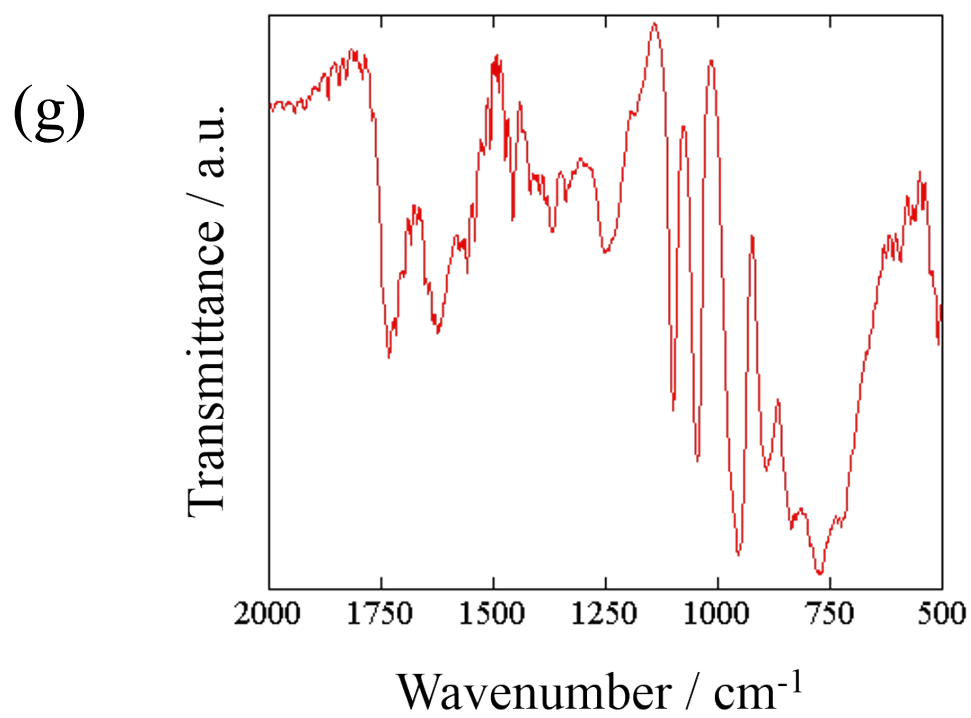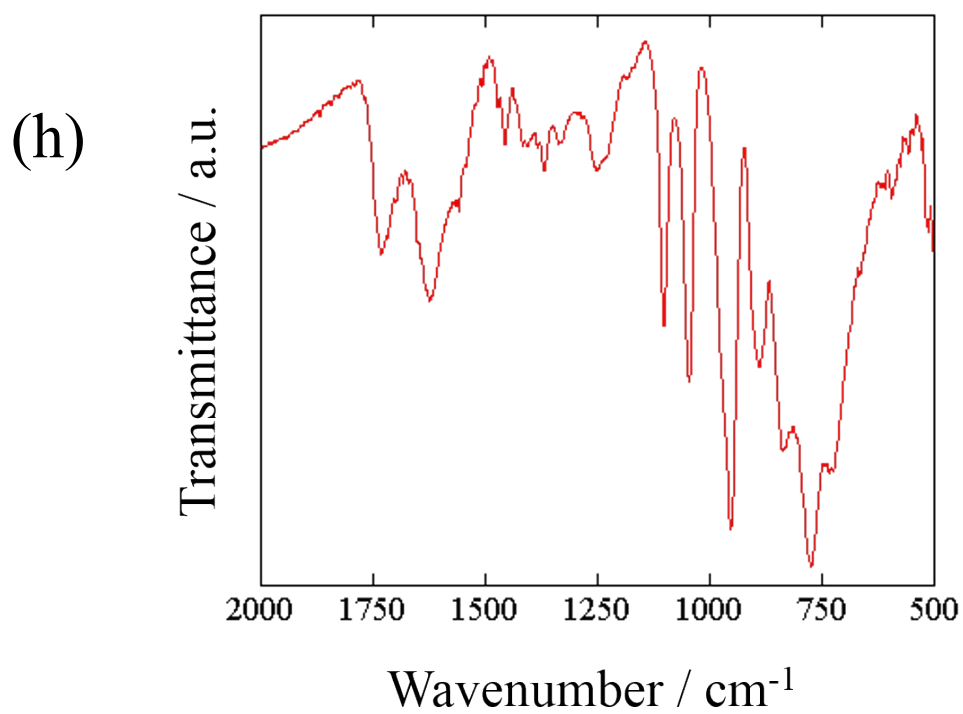

Figure S1 (Continued)

(i)

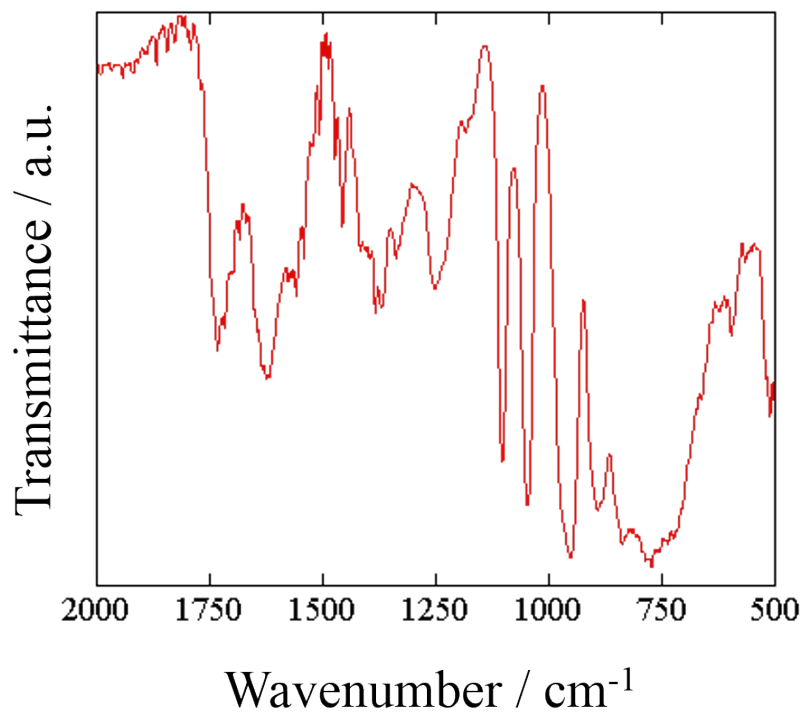

(j)

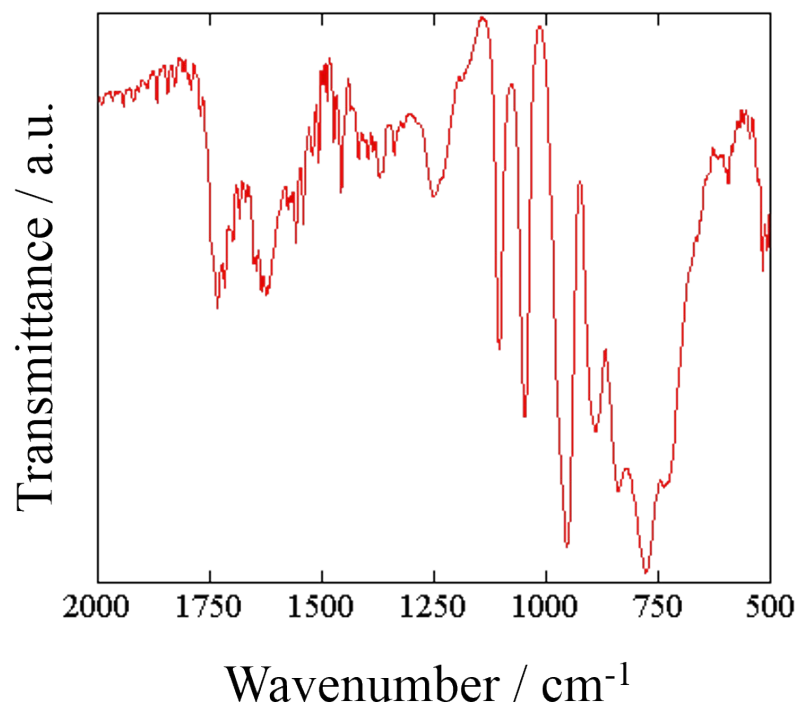

Figure S1 (Continued)

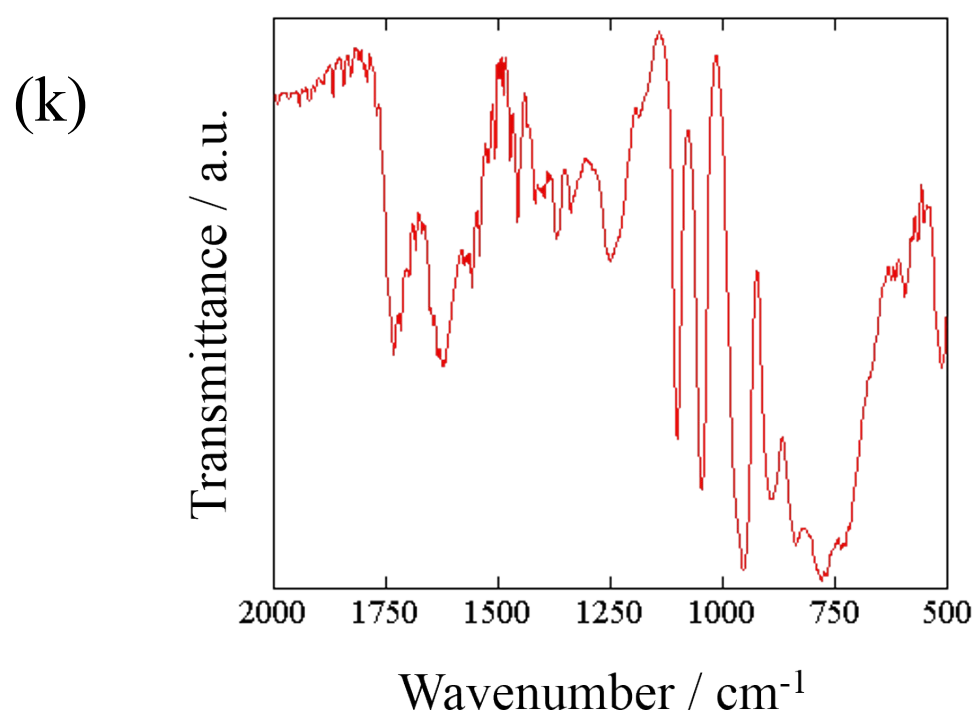

Figure S2

(a)

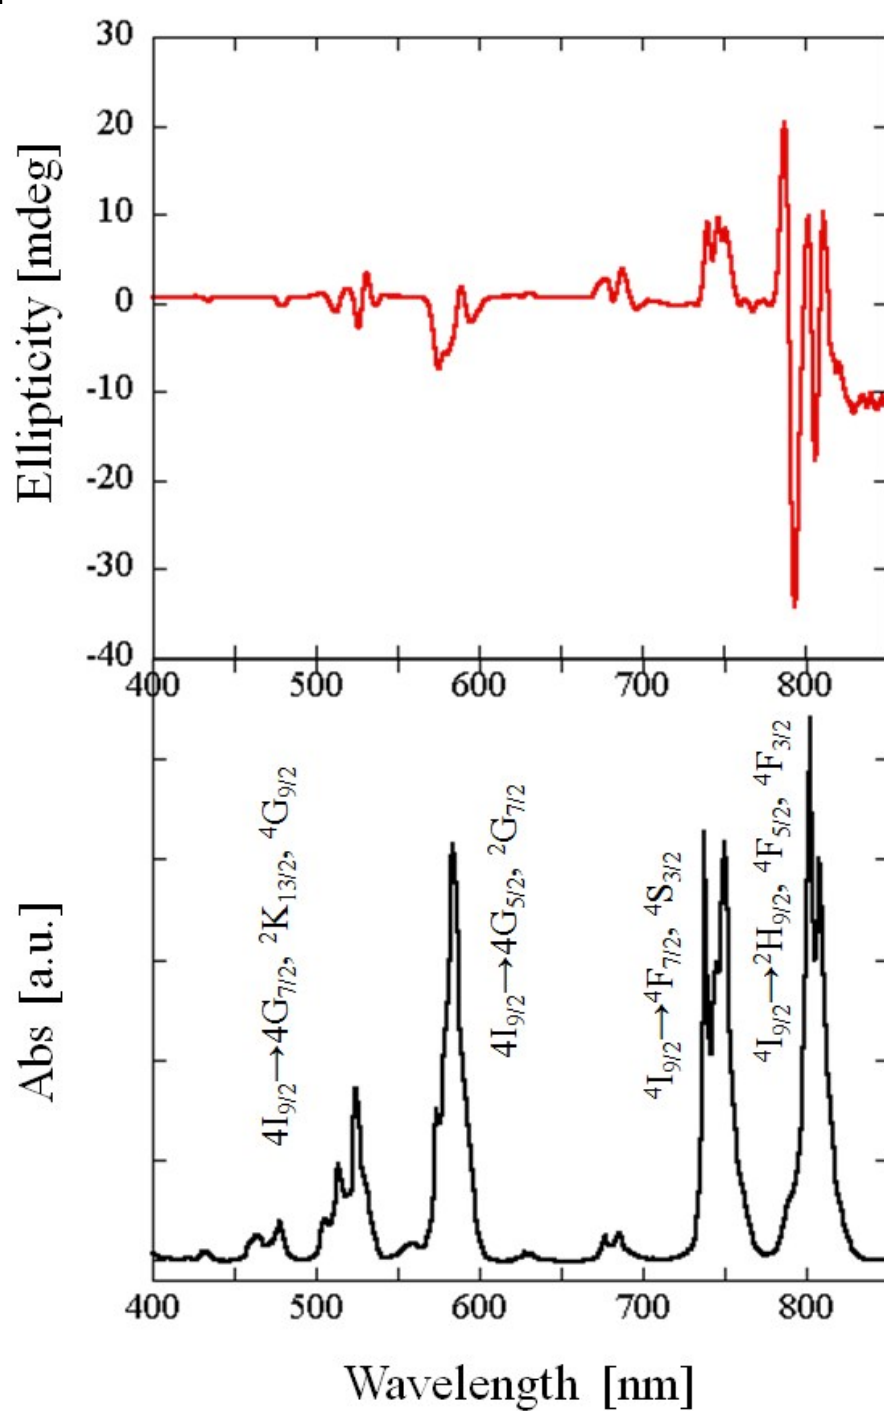

Figure S2 (Continued)

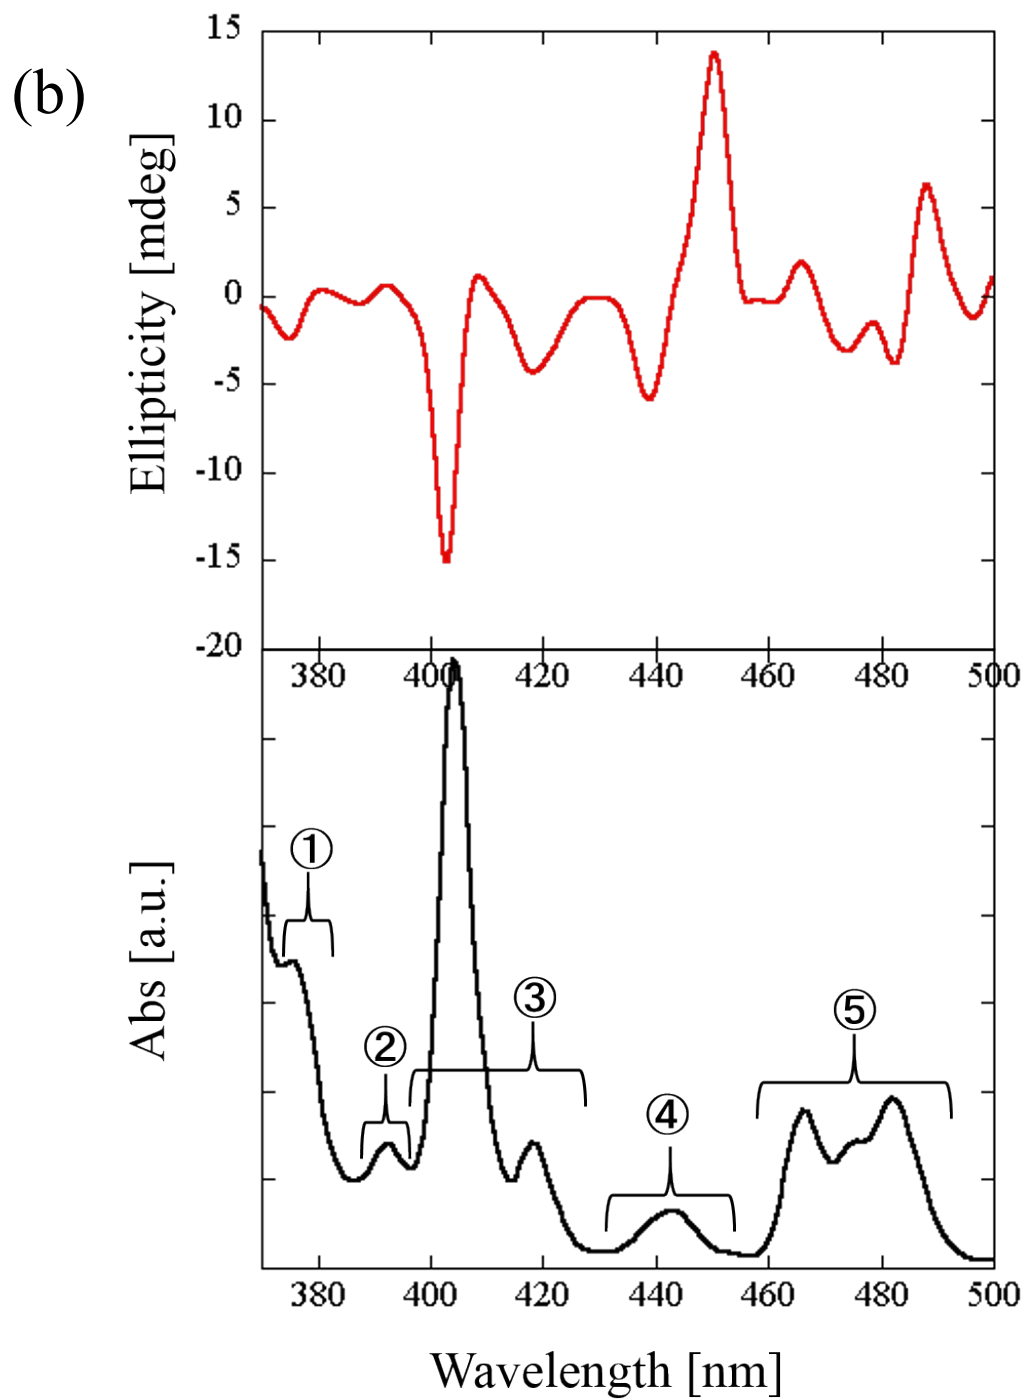

- ①  ${}^6\text{H}_{5/2} \rightarrow {}^4\text{D}_{3/2}, ({}^4\text{D}, {}^6\text{P})_{5/2}, {}^4\text{H}_{7/2}$
- ②  ${}^6\text{H}_{5/2} \rightarrow {}^4\text{D}_{1/2}, {}^6\text{P}_{7/2}, {}^4\text{F}_{9/2}, {}^4\text{L}_{17/2}, {}^4\text{K}_{13/2}$
- ③  ${}^6\text{H}_{5/2} \rightarrow ({}^6\text{P}, {}^4\text{P})_{5/2}, {}^4\text{L}_{13/2}, {}^4\text{F}_{7/2}, {}^6\text{P}_{3/2}, {}^4\text{K}_{11/2}, {}^4\text{L}_{15/2}, {}^4\text{G}_{11/2}$
- ④  ${}^6\text{H}_{5/2} \rightarrow {}^4\text{F}_{5/2}, {}^4\text{M}_{17/2}, {}^4\text{G}_{9/2}, {}^4\text{I}_{15/2}$
- ⑤  ${}^6\text{H}_{5/2} \rightarrow {}^4\text{G}_{7/2}, {}^4\text{I}_{9/2}, {}^4\text{M}_{15/2}, {}^4\text{I}_{11/2}, {}^4\text{I}_{13/2}$

Figure S2 (Continued)

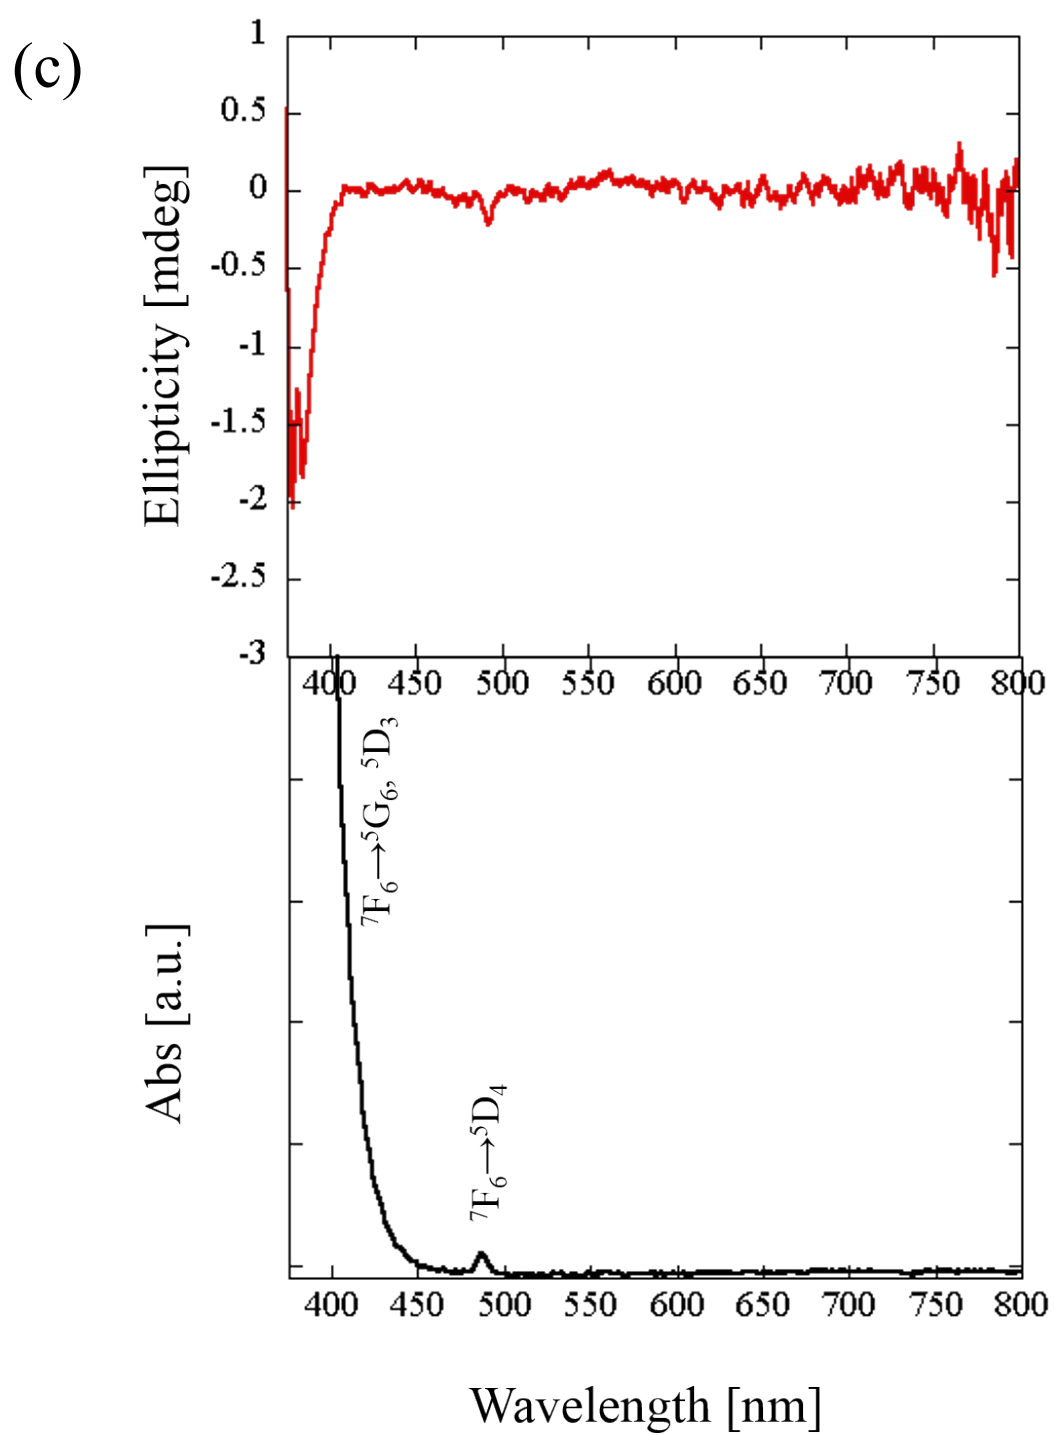

Figure S2 (Continued)

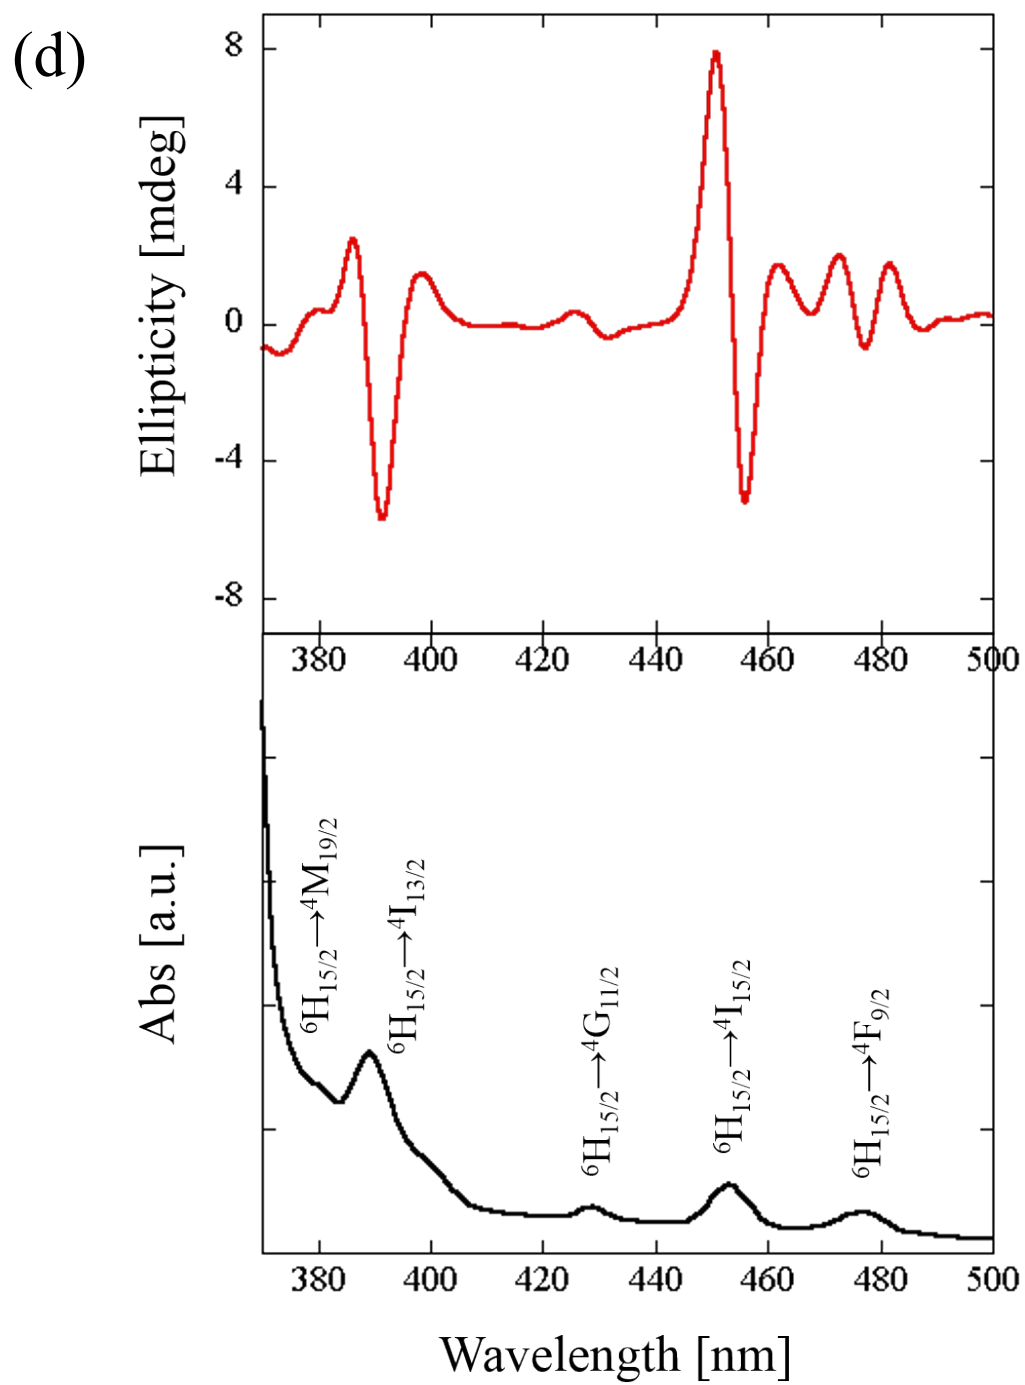

Supplement: c6ra22278a1.pdf [file c6ra22278a1.pdf]
